# Supplementary material for: Plant Secondary Compounds Promote White Adipose Tissue Browning via Modulation of the Gut Microbiota in Small Mammals
Source: MDPI journal article supplement (doi:10.3390/ijms242417420), 2023-12-13
Supplement: s1 [file s1]

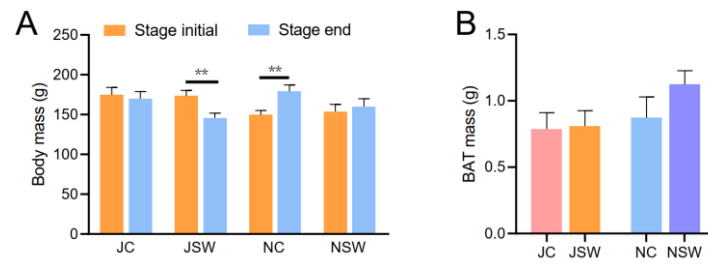

**Figure S1.** Changes in body mass and BAT mass of pikas. (A) Body mass, (B) BAT mass.

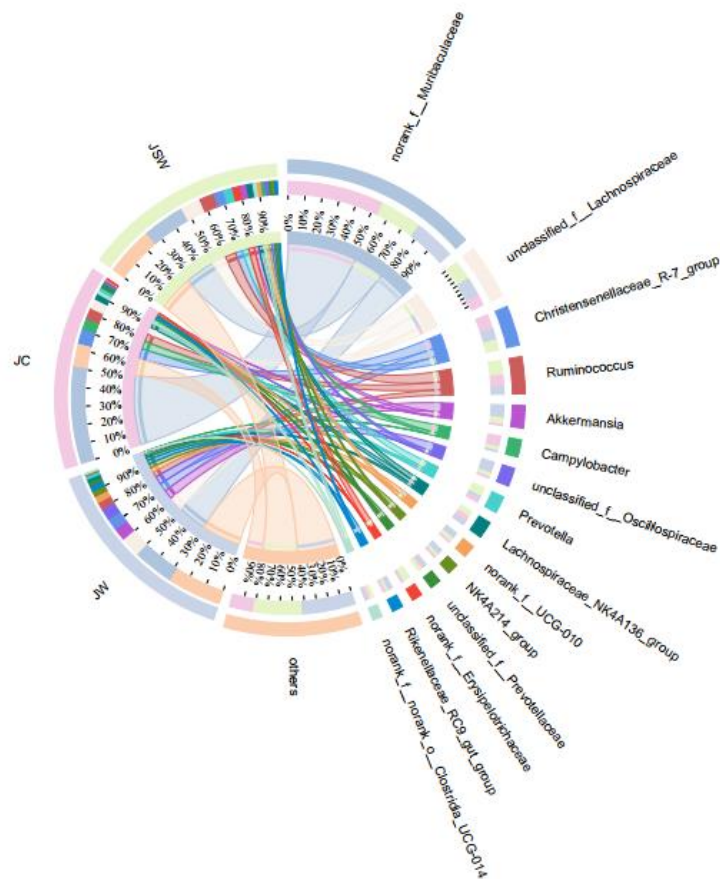

**Figure S2.** Pika gut bacteria composition at the genus level in July.

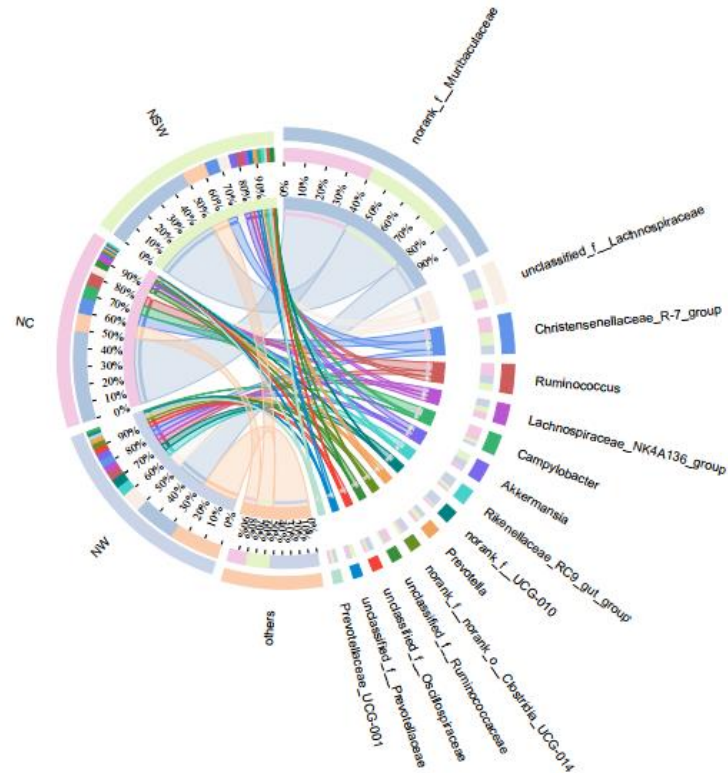

**Figure S3.** Pika gut bacteria composition at the genus level in November.

**Table S1.** PERMANOVA analysis based on Bray-Curtis distance compared the gut microbiota of pikas between different groups.

|           | PERMANOVA |                |       |
|-----------|-----------|----------------|-------|
|           | F         | R <sup>2</sup> | p     |
| JW vs JC  | 25.570    | 0.587          | 0.001 |
| JW vs JSW | 7.263     | 0.299          | 0.001 |
| JC vs JSW | 25.266    | 0.598          | 0.001 |
| NW vs NC  | 41.809    | 0.699          | 0.001 |
| NW vs NSW | 18.651    | 0.554          | 0.001 |
| NC vs NSW | 6.348     | 0.297          | 0.001 |

**Table S2.** Results of the Mann-Whitney U test comparing the abundance of dominate bacterial taxa between plateau pikas in the JW and JC groups, and JW and JSW groups.

| Taxa                                 | JW vs JC      |                   | JW vs JSW     |                   |
|--------------------------------------|---------------|-------------------|---------------|-------------------|
|                                      | Z             | p                 | Z             | p                 |
| Phylum                               |               |                   |               |                   |
| Firmicutes                           | <b>3.099</b>  | <b>0.001</b>      | -1.061        | 0.315             |
| Bacteroidetes                        | <b>-3.250</b> | <b>&lt; 0.001</b> | 0.653         | 0.549             |
| Verrucomicrobiota                    | <b>3.780</b>  | <b>&lt; 0.001</b> | 1.715         | 0.095             |
| Campilobacterota                     | <b>-3.780</b> | <b>&lt; 0.001</b> | <b>-3.266</b> | <b>&lt; 0.001</b> |
| Actinobacteriota                     | <b>3.704</b>  | <b>&lt; 0.001</b> | <b>3.593</b>  | <b>&lt; 0.001</b> |
| Spirochaetota                        | <b>2.873</b>  | <b>0.003</b>      | -0.898        | 0.400             |
| Proteobacteria                       | -1.663        | 0.105             | <b>-2.449</b> | <b>0.013</b>      |
| Cyanobacteria                        | <b>2.117</b>  | <b>0.035</b>      | -1.715        | 0.095             |
| Desulfobacterota                     | 1.739         | 0.089             | 0.572         | 0.604             |
| Patescibacteria                      | <b>-3.476</b> | <b>&lt; 0.001</b> | <b>-3.768</b> | <b>&lt; 0.001</b> |
| Genus                                |               |                   |               |                   |
| norank_f_Muribaculaceae              | <b>-3.780</b> | <b>&lt; 0.001</b> | 0.327         | 0.780             |
| unclassified_f_Lachnospiraceae       | <b>3.024</b>  | <b>0.002</b>      | -1.306        | 0.211             |
| Christensenellaceae_R-7_group        | -1.587        | 0.123             | 0.163         | 0.906             |
| Ruminococcus                         | -1.965        | 0.052             | <b>-2.613</b> | <b>0.008</b>      |
| Akkermansia                          | <b>3.780</b>  | <b>&lt; 0.001</b> | 1.715         | 0.095             |
| Campylobacter                        | <b>-3.780</b> | <b>&lt; 0.001</b> | <b>-3.429</b> | <b>&lt; 0.001</b> |
| unclassified_f_Oscillospiraceae      | <b>3.780</b>  | <b>&lt; 0.001</b> | <b>3.674</b>  | <b>&lt; 0.001</b> |
| Lachnospiraceae_NK4A136_group        | <b>-2.646</b> | <b>0.007</b>      | <b>-2.858</b> | <b>0.003</b>      |
| Prevotella                           | 0.227         | 0.853             | <b>-2.613</b> | <b>0.008</b>      |
| norank_f_UCG-010                     | <b>3.780</b>  | <b>&lt; 0.001</b> | <b>2.286</b>  | <b>0.022</b>      |
| NK4A214_group                        | <b>3.780</b>  | <b>&lt; 0.001</b> | <b>3.021</b>  | <b>0.001</b>      |
| unclassified_f_Prevotellaceae        | 1.361         | 0.190             | 1.715         | 0.095             |
| Rikenellaceae_RC9_gut_group          | <b>3.326</b>  | <b>&lt; 0.001</b> | <b>3.266</b>  | <b>&lt; 0.001</b> |
| norank_f_Erysipelotrichaceae         | 1.210         | 0.247             | -3.186        | 0.001             |
| norank_f_norank_o_Clostridia_UCG-014 | <b>-3.780</b> | <b>&lt; 0.001</b> | <b>-3.674</b> | <b>&lt; 0.001</b> |

Significant effects are in bold.

**Table S3.** Results of the Mann-Whitney U test comparing the abundance of dominate bacterial taxa between plateau pikas in the NW and NC groups, and NW and NSW groups.

| Taxa                                 | NW vs NC      |                   | NW vs NSW     |                   |
|--------------------------------------|---------------|-------------------|---------------|-------------------|
|                                      | Z             | p                 | Z             | p                 |
| Phylum                               |               |                   |               |                   |
| Bacteroidetes                        | <b>-3.628</b> | <b>&lt; 0.001</b> | <b>-3.416</b> | <b>&lt; 0.001</b> |
| Firmicutes                           | <b>3.780</b>  | <b>&lt; 0.001</b> | <b>3.416</b>  | <b>&lt; 0.001</b> |
| Campilobacterota                     | <b>-3.780</b> | <b>&lt; 0.001</b> | -1.464        | 0.161             |
| Verrucomicrobiota                    | <b>3.780</b>  | <b>&lt; 0.001</b> | -0.098        | 0.962             |
| Actinobacteriota                     | 1.512         | 0.143             | <b>2.635</b>  | <b>0.007</b>      |
| Proteobacteria                       | <b>3.024</b>  | <b>0.002</b>      | <b>2.147</b>  | <b>0.033</b>      |
| Spirochaetota                        | 1.512         | 0.143             | -1.757        | 0.088             |
| Patescibacteria                      | -0.605        | 0.579             | 1.464         | 0.161             |
| Cyanobacteria                        | <b>3.099</b>  | <b>0.001</b>      | 0.098         | 1.000             |
| Desulfobacterota                     | <b>3.780</b>  | <b>&lt; 0.001</b> | 3.416         | <b>&lt; 0.001</b> |
| Genus                                |               |                   |               |                   |
| norank_f_Muribaculaceae              | <b>-3.780</b> | <b>&lt; 0.001</b> | <b>-3.318</b> | <b>&lt; 0.001</b> |
| unclassified_f_Lachnospiraceae       | <b>3.628</b>  | <b>&lt; 0.001</b> | <b>2.733</b>  | <b>0.005</b>      |
| Christensenellaceae_R-7_group        | <b>-3.477</b> | <b>&lt; 0.001</b> | <b>-2.928</b> | <b>0.002</b>      |
| Ruminococcus                         | -1.209        | 0.247             | 1.269         | 0.230             |
| Campylobacter                        | <b>-3.780</b> | <b>&lt; 0.001</b> | -1.952        | 0.055             |
| Lachnospiraceae_NK4A136_group        | <b>2.041</b>  | <b>0.043</b>      | 1.366         | 0.193             |
| Akkermansia                          | <b>3.780</b>  | <b>&lt; 0.001</b> | -0.098        | 0.962             |
| Rikenellaceae_RC9_gut_group          | <b>3.780</b>  | <b>&lt; 0.001</b> | <b>2.928</b>  | <b>0.002</b>      |
| norank_f_UCG-010                     | <b>3.780</b>  | <b>&lt; 0.001</b> | <b>3.416</b>  | <b>&lt; 0.001</b> |
| Prevotella                           | <b>3.326</b>  | <b>&lt; 0.001</b> | -0.390        | 0.740             |
| norank_f_norank_o_Clostridia_UCG-014 | <b>3.250</b>  | <b>&lt; 0.001</b> | <b>3.220</b>  | <b>&lt; 0.001</b> |
| unclassified_f_Ruminococcaceae       | <b>-3.704</b> | <b>&lt; 0.001</b> | 1.659         | 0.109             |
| unclassified_f_Oscillospiraceae      | <b>3.780</b>  | <b>&lt; 0.001</b> | <b>3.220</b>  | <b>&lt; 0.001</b> |
| Prevotellaceae_UCG-001               | <b>3.326</b>  | <b>&lt; 0.001</b> | -0.390        | 0.740             |
| unclassified_f_Prevotellaceae        | 1.436         | 0.165             | <b>-3.318</b> | <b>&lt; 0.001</b> |

Significant effects are in bold.

**Table S4.** Network indices of pika gut microbiota.

| Network indices                | JW     | JC    | JSW    | NW     | NC    | NSW   |
|--------------------------------|--------|-------|--------|--------|-------|-------|
| Total nodes                    | 66     | 68    | 69     | 68     | 69    | 69    |
| Total links                    | 333    | 251   | 422    | 355    | 238   | 329   |
| Positive links                 | 215    | 204   | 354    | 258    | 176   | 268   |
| Negative links                 | 118    | 47    | 68     | 97     | 62    | 61    |
| Average degree                 | 10.091 | 7.382 | 12.232 | 10.441 | 6.899 | 9.536 |
| Density                        | 0.155  | 0.110 | 0.180  | 0.156  | 0.101 | 0.140 |
| Average clustering coefficient | 0.643  | 0.561 | 0.622  | 0.612  | 0.569 | 0.697 |
| Average path length            | 2.942  | 3.159 | 2.562  | 2.688  | 3.628 | 2.958 |

**Table S5.** PERMANOVA analysis based on Bray-Curtis distance compared the function profiles of pika gut microbiota between different groups.

|           | PERMANOVA |                |       |
|-----------|-----------|----------------|-------|
|           | F         | R <sup>2</sup> | p     |
| JW vs JC  | 19.015    | 0.214          | 0.002 |
| JW vs JSW | 5.596     | 0.248          | 0.006 |
| JC v JSW  | 18.359    | 0.519          | 0.002 |
| NW vs NC  | 16.577    | 0.479          | 0.001 |
| NW vs NSW | 10.036    | 0.401          | 0.001 |
| NC vs NSW | 8.796     | 0.370          | 0.001 |

**Table S6.** Results of the Mann-Whitney U test comparing the abundance of KEGG metabolism categories (level 2) between plateau pikas in the JW and JC groups, and JW and JSW groups.

| KEGG level 2                                | JW vs JC      |                   | JW vs JSW     |                   |
|---------------------------------------------|---------------|-------------------|---------------|-------------------|
|                                             | Z             | p                 | Z             | p                 |
| Global and overview maps                    | -1.890        | 0.063             | <b>-2.531</b> | <b>0.010</b>      |
| Carbohydrate metabolism                     | 1.890         | 0.063             | <b>-2.613</b> | <b>0.008</b>      |
| Amino acid metabolism                       | <b>3.780</b>  | <b>&lt; 0.001</b> | <b>3.674</b>  | <b>&lt; 0.001</b> |
| Energy metabolism                           | <b>-3.553</b> | <b>&lt; 0.001</b> | -0.163        | 0.905             |
| Metabolism of cofactors and vitamins        | 0.076         | 1.000             | <b>2.286</b>  | <b>0.022</b>      |
| Translation                                 | <b>3.628</b>  | <b>&lt; 0.001</b> | <b>3.511</b>  | <b>&lt; 0.001</b> |
| Replication and repair                      | <b>3.780</b>  | <b>&lt; 0.001</b> | <b>3.184</b>  | <b>0.001</b>      |
| Membrane transport                          | -0.076        | 0.971             | -1.633        | 0.113             |
| Nucleotide metabolism                       | <b>2.948</b>  | <b>0.002</b>      | <b>2.449</b>  | <b>0.013</b>      |
| Signal transduction                         | 0.680         | 0.529             | 0.082         | 1.000             |
| Cellular community – prokaryotes            | 0.454         | 0.684             | -0.980        | 0.356             |
| Lipid metabolism                            | <b>-3.780</b> | <b>&lt; 0.001</b> | -1.633        | 0.113             |
| Glycan biosynthesis and metabolism          | <b>-2.041</b> | <b>0.043</b>      | 0.653         | 0.549             |
| Biosynthesis of other secondary metabolites | -1.890        | 0.063             | -0.245        | 0.842             |
| Folding, sorting and degradation            | -0.680        | 0.529             | 1.388         | 0.182             |

Significant effects are in bold.

**Table S7.** Results of the Mann-Whitney U test comparing the abundance of KEGG metabolism categories (level 2) between plateau pikas in the NW and NC groups, and NW and NSW groups.

| KEGG level 2                                | NW vs NC      |                   | NW vs NSW     |                   |
|---------------------------------------------|---------------|-------------------|---------------|-------------------|
|                                             | Z             | p                 | Z             | p                 |
| Global and overview maps                    | <b>-3.780</b> | <b>&lt; 0.001</b> | -1.171        | 0.270             |
| Carbohydrate metabolism                     | <b>2.192</b>  | <b>0.029</b>      | <b>-2.733</b> | <b>0.005</b>      |
| Amino acid metabolism                       | <b>3.780</b>  | <b>&lt; 0.001</b> | <b>3.416</b>  | <b>&lt; 0.001</b> |
| Energy metabolism                           | <b>-3.780</b> | <b>&lt; 0.001</b> | <b>-2.342</b> | <b>0.019</b>      |
| Metabolism of cofactors and vitamins        | -0.832        | 0.436             | <b>-2.049</b> | <b>0.043</b>      |
| Translation                                 | <b>-2.041</b> | <b>0.043</b>      | 1.269         | 0.230             |
| Replication and repair                      | 1.512         | 0.143             | 1.073         | 0.315             |
| Membrane transport                          | 1.209         | 0.247             | 1.366         | 0.193             |
| Nucleotide metabolism                       | 1.361         | 0.190             | -1.757        | 0.088             |
| Signal transduction                         | <b>2.797</b>  | <b>0.004</b>      | <b>2.733</b>  | <b>0.005</b>      |
| Cellular community – prokaryotes            | <b>2.948</b>  | <b>0.002</b>      | <b>2.440</b>  | <b>0.014</b>      |
| Lipid metabolism                            | -1.512        | 0.143             | -1.366        | 0.193             |
| Glycan biosynthesis and metabolism          | <b>-3.477</b> | <b>&lt; 0.001</b> | <b>-3.416</b> | <b>&lt; 0.001</b> |
| Biosynthesis of other secondary metabolites | <b>-2.570</b> | <b>0.009</b>      | <b>-3.318</b> | <b>&lt; 0.001</b> |
| Folding, sorting and degradation            | <b>-2.495</b> | <b>0.011</b>      | 0.586         | 0.601             |

Significant effects are in bold.
